# Supplementary material for: Bioinformatics Identification of Drug Resistance-Associated Gene Pairs in Mycobacterium tuberculosis
Source: PubMed Central journal article supplement (PMC5037696; doi:10.3390/ijms17091417), 2016-08-27
Supplement: ijms-17-01417-s001.pdf [file ijms-17-01417-s001.pdf]

# Supplementary Materials: Bioinformatics Identification of Drug Resistance-Associated Gene Pairs in *Mycobacterium tuberculosis*

Ze-Jia Cui, Qing-Yong Yang, Hong-Yu Zhang, Qiang Zhu and Qing-Ye Zhang

**Table S1.** The summarized results by GBOOST (The Hong Kong University, Clear Water Bay, Kowloon, Hong Kong, China) based on the dataset 1.

| Sample     | EMB <sup>a</sup> | INH <sup>b</sup> | RMP <sup>c</sup> | STR <sup>d</sup> |
|------------|------------------|------------------|------------------|------------------|
| SNP pairs  | 1407             | 3057             | 3925             | 2018             |
| Gene pairs | 1215             | 2597             | 3328             | 1636             |

<sup>a</sup> ethambutol; <sup>b</sup> isoniazid; <sup>c</sup> rifampicin; <sup>d</sup> streptomycin.

**Table S2.** The summarized results by GBOOST based on the dataset 2.

| Sample     | CPM <sup>a</sup> | EMB <sup>b</sup> | ETH <sup>c</sup> | INH <sup>d</sup> | KAN <sup>e</sup> | OFX <sup>f</sup> | RMP <sup>g</sup> | STR <sup>h</sup> |
|------------|------------------|------------------|------------------|------------------|------------------|------------------|------------------|------------------|
| SNP pairs  | 786              | 840              | 2499             | 269              | 871              | 722              | 269              | 1244             |
| Gene pairs | 695              | 694              | 2002             | 219              | 761              | 620              | 219              | 969              |

<sup>a</sup> capreomycin; <sup>b</sup> ethambutol; <sup>c</sup> ethionamide; <sup>d</sup> isoniazid; <sup>e</sup> kanamycin; <sup>f</sup> ofloxacin; <sup>g</sup> rifampicin; <sup>h</sup> streptomycin.

**Table S3.** Anti-tuberculosis drug targets information from DrugBank <sup>a</sup>.

| Drug              | Targets (Abbreviation)                                                                                                                                                                                     |
|-------------------|------------------------------------------------------------------------------------------------------------------------------------------------------------------------------------------------------------|
| Capreomycin (CPM) | 70S ribosome                                                                                                                                                                                               |
| Ethambutol (EMB)  | probable arabinosyltransferase C (embC)<br>probable arabinosyltransferase B (embB)<br>probable arabinosyltransferase A (embA)                                                                              |
| Ethionamide (ETH) | catalase-peroxidase (KatG)<br>enoyl-(acyl-carrier-protein) reductase (NADH) (InhA)                                                                                                                         |
| Isoniazid (INH)   | catalase-peroxidase (KatG)<br>enoyl-(acyl-carrier-protein) reductase (NADH) (InhA)<br>cytochrome P450 2C8<br>cytochrome P450 1A2<br>cytochrome P450 3A4<br>cytochrome P450 2C19<br>dihydrofolate reductase |
| Kanamycin (KAN)   | 30S ribosomal protein S12<br>16S rRNA                                                                                                                                                                      |
| Ofloxacin (OFX)   | DNA gyrase subunit A<br>DNA topoisomerase 4 subunit A<br>DNA topoisomerase 2- $\alpha$                                                                                                                     |

**Table S3.** *Cont.*

| <b>Drug</b>        | <b>Targets (Abbreviation)</b>                                                                                                                                                                                                                                                                                                                                                                                                                               |
|--------------------|-------------------------------------------------------------------------------------------------------------------------------------------------------------------------------------------------------------------------------------------------------------------------------------------------------------------------------------------------------------------------------------------------------------------------------------------------------------|
| Rifampicin (RMP)   | DNA-directed RNA polymerase subunit $\beta$<br>DNA-directed RNA polymerase subunit $\beta$<br>nuclear receptor subfamily 1 group I member 2<br>solute carrier organic anion transporter family member 1B1<br>solute carrier organic anion transporter family member 1A2<br>solute carrier organic anion transporter family member 1B3<br>Lanosterol 14- $\alpha$ demethylase<br>Serum albumin<br>solute carrier organic anion transporter family member 2B1 |
| Streptomycin (STR) | 30S ribosomal protein S12<br>16S rRNA<br>protein-arginine deiminase type-4                                                                                                                                                                                                                                                                                                                                                                                  |

<sup>a</sup> <http://www.drugbank.ca>.
